# Supplementary material for: Metabolomics Profiling of Age-Associated Metabolites in Malay Population
Source: Hindawi journal article supplement (doi:10.1155/2023/4416410), 2023-02-04
Supplement: f1 [file 4416410.f1.zip]

## Supplementary Information

(A)

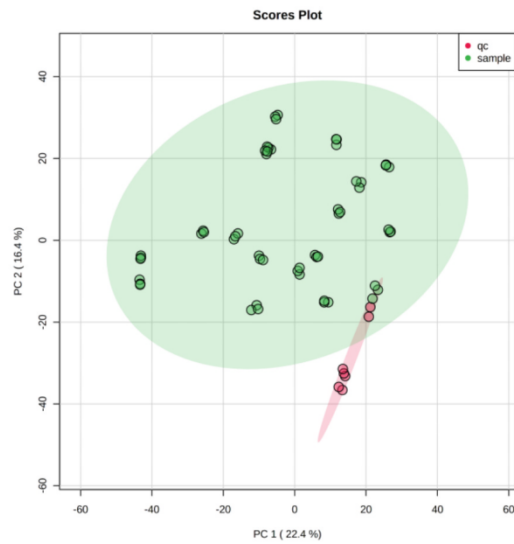

(B)

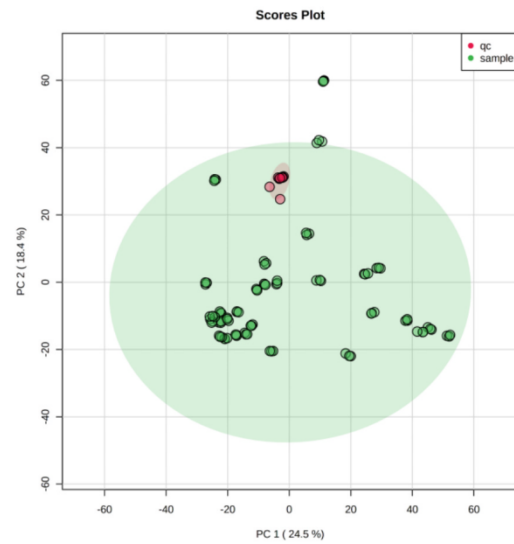

(C)

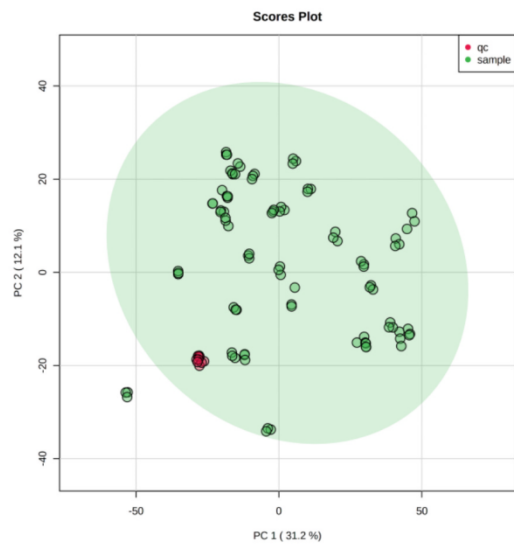

(D)

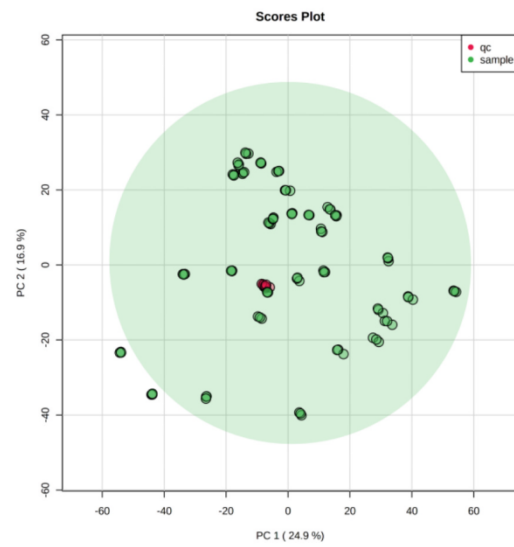

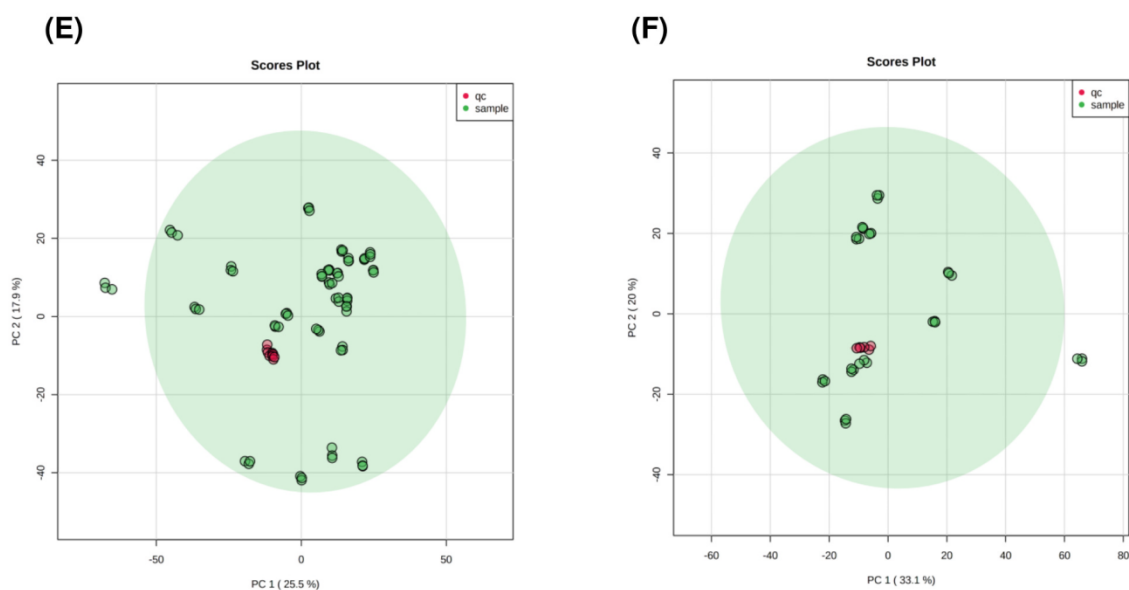

**Figure S1.** PCA score plot of samples in run 1 – 6 for positive ion mode. Run 1 to 6 (A to F). The QC samples in run 1 were scattered into 2 regions, implying existence of batch effects. QC samples of other runs were tightly clustered together within the respective runs, implying the runs were stable and reliable. Red dot is QC sample; green dot is plasma sample; shade area is the 95% confidence region.

(A)

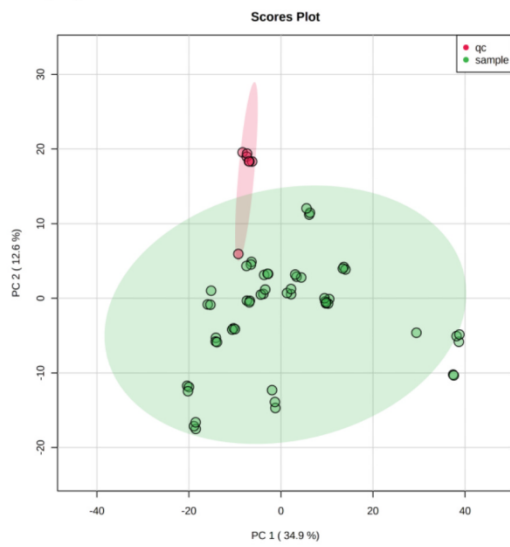

(B)

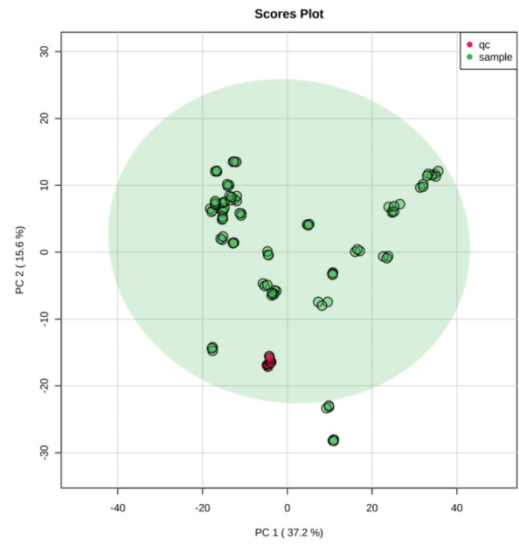

(C)

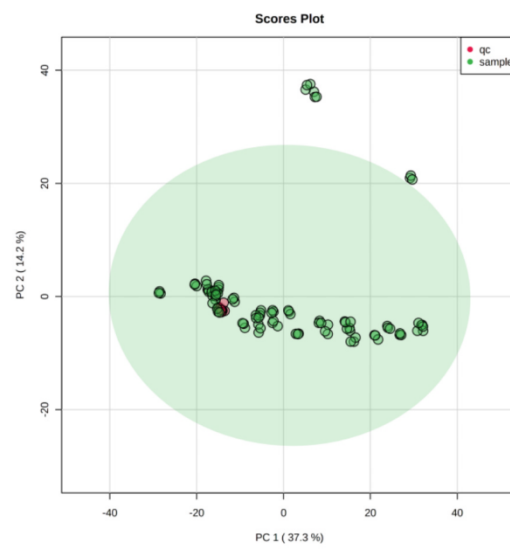

(D)

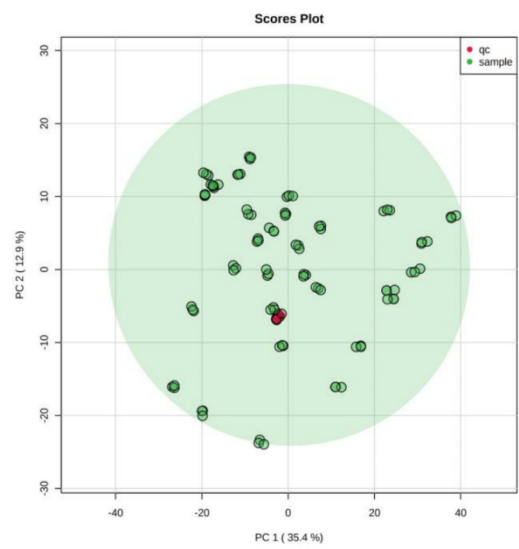

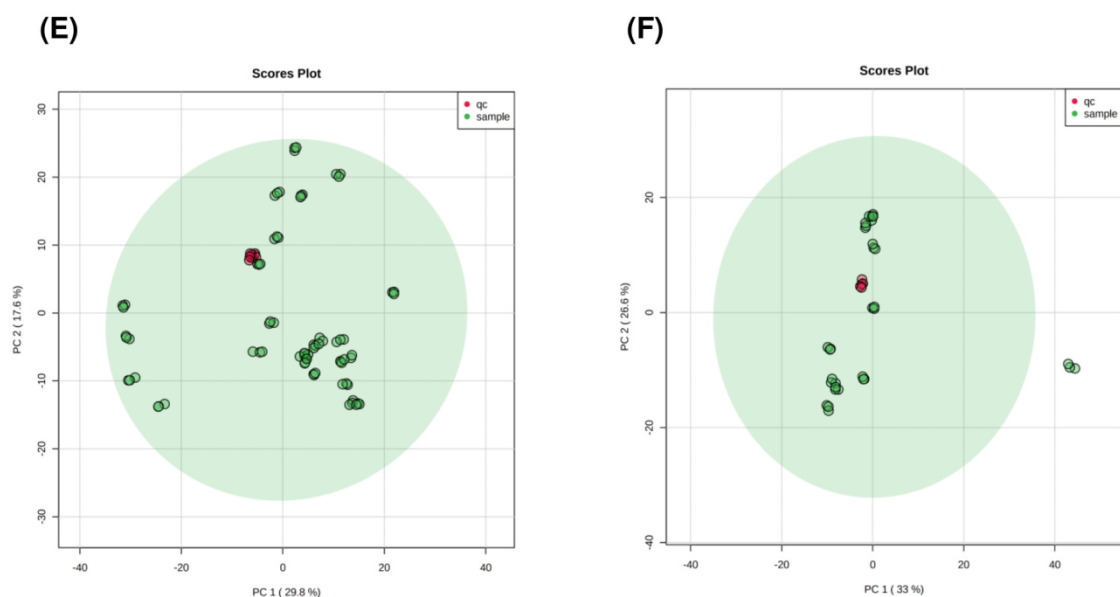

**Figure S2.** PCA score plot of samples in run 1 – 6 for negative ion mode. Run 1 to 6 (A to F). The QC samples in run 1 were scattered into 2 regions, implying existence of batch effects. QC samples of other runs were tightly clustered together within the respective runs, implying the runs were stable and reliable. Red dot is QC sample; green dot is plasma sample; shade area is the 95% confidence region.

**Table S1.** Number of total MFs detected, significant MFs, and significant metabolites with level 2 confidence annotation.

| Number                                                    | Association with gender <sup>a</sup> |     | Association with age <sup>b</sup> |     | Association with age in men |     | Association with age in women |     |
|-----------------------------------------------------------|--------------------------------------|-----|-----------------------------------|-----|-----------------------------|-----|-------------------------------|-----|
|                                                           | +                                    | -   | +                                 | -   | +                           | -   | +                             | -   |
| Ion mode                                                  |                                      |     |                                   |     |                             |     |                               |     |
| Total MFs detected                                        | 2424                                 | 834 | 2424                              | 834 | 2424                        | 834 | 2424                          | 834 |
| Significant MFs (FDR < 0.05)                              | 194                                  | 90  | 1020                              | 325 | 744                         | 225 | 692                           | 228 |
| Significant metabolites annotated at level 2              | 15                                   | 8   | 45                                | 16  | 27                          | 17  | 25                            | 13  |
| Total significant metabolites annotated*                  | 23                                   |     | 58 (3)                            |     | 40 (4)                      |     | 36 (2)                        |     |
| Total significant metabolites annotated* with QC CV < 30% | 18                                   |     | 26                                |     | 20                          |     | 16                            |     |

MFs: metabolite features; FDR: false discovery rate; <sup>a</sup> adjusted for age; <sup>b</sup> adjusted for gender; () : number of repeated metabolites in both modes; \* after subtracting those repeated metabolites that were detected in both modes; QC CV: coefficient of variation for QC.
