# Supplementary material for: Metabolomics Profiling of Age-Associated Metabolites in Malay Population
Source: Oxid Med Cell Longev. 2023 Feb 4;2023:4416410. doi: 10.1155/2023/4416410 (PMC9922189; doi:10.1155/2023/4416410)
Supplement: Supplementary Materials — Supplementary Information Method 1: LCMS method. Supplementary Figure S1: PCA score plot of samples in runs 1–6 for positive ion mode. Supplementary Figure S2: PCA score plot of samples in runs 1–6 for negative ion mode. Supplementary Table S1: number of total MFs detected, significant MFs, and significant metabolites with level 2 confidence annotation. [file 4416410.f1.zip]

Archive with 2 entries (2 files):
- Supplementary Information Method 1.docx
- Supplementary Materials_v2.pdf
